# Supplementary material for: Retracted Article: Plasma-grafted amidoxime/metal–organic framework composites for the selective sequestration of U(vi)
Source: Royal Society of Chemistry journal article supplement (doi:10.1039/c8en00583d), 2018-01-01
Supplement: c8en00583d1.pdf [file c8en00583d1.pdf]

**Supporting Information (SI) on**  
**Plasma-grafting amidoxime/metal-organic framework composites for**  
**the selective sequestration of U(VI)**

Fengbo Li<sup>1</sup>, Xiaoyu Li<sup>1,2</sup>, Pu Cui<sup>1,2</sup>, Yubing Sun<sup>3\*</sup>

<sup>1</sup> The school of Life Science and Environmental Science, Huangshan University,  
Huangshan, 245041, P. R. China

<sup>2</sup> State Key Laboratory of Tea Plant Biology and Utilization, Anhui Agricultural  
University, Hefei, 230036, P. R. China

<sup>3</sup> College of Environmental Science and Engineering, North China Electric Power  
University, Beijing 102206, P. R. China

\*Email: [sunyb@ipp.ac.cn](mailto:sunyb@ipp.ac.cn) (Y. Sun); Phone: 86-10-61772890. Fax: 86-10-61772890.

**Adsorption Kinetic Models.** The pseudo-first-order and pseudo-second-order models can be described by Eqns. (S1) and (S2), respectively:

$$\ln(q_e - q_t) = \ln q_e - k_1 \times t \quad (\text{S1})$$

$$\frac{t}{q_t} = \frac{1}{K_2 \times q_e^2} + \frac{t}{q_e} \quad (\text{S2})$$

where  $q_e$  and  $q_t$  are the adsorption amounts of U(VI) (mg/g) at equilibrium time (h) and time  $t$  (h), respectively;  $k_1$  ( $\text{h}^{-1}$ ) and  $k_2$  ( $\text{g}/(\text{mg} \times \text{h})$ ) represent the kinetic rate constants of the pseudo first-order and pseudo-second-order models, respectively.

The calculated kinetic parameters of pseudo first-order and pseudo-second-order models are shown in Table S1.

**Table S1.** The constants of pseudo-first-order and pseudo-second-order kinetic models for U(VI) removal on AO/MOF composites

| Pseudo-first-order |                      |        | Pseudo-second-order |                                             |        |
|--------------------|----------------------|--------|---------------------|---------------------------------------------|--------|
| $q_e(\text{mg/g})$ | $K_1(\text{h}^{-1})$ | $R^2$  | $q_e(\text{mg/g})$  | $K_2(\text{g}/(\text{mg} \times \text{h}))$ | $R^2$  |
| 3.3458             | 0.2036               | 0.8294 | 20.04               | 0.4611                                      | 0.9999 |

**Langmuir and Freundlich Models.** The Langmuir and Freundlich models can be depicted as Eqns. (S3) and (S4), respectively:

$$\frac{C_e}{q_e} = \frac{C_e}{q_{max}} + \frac{1}{K_L \times q_{max}} \quad (\text{S3})$$

$$\ln q_e = \ln K_F + \frac{1}{n} \times \ln C_e \quad (\text{S4})$$

where  $C_e$  (mol/L) is the equilibrium concentration of U(VI) remaining in the liquid

phase,  $q_e$  (mg/g) is the amount of U(VI) adsorbed on adsorbent after adsorption equilibrium,  $K_L$  (L/mg) is a constant related to the enthalpy of adsorption, and  $q_{\max}$  (mg/g), the maximum sorption capacity, represents the amount of sorbate at complete monolayer coverage.  $K_F$  ( $\text{mg}^{1-n}\text{L}^n\text{g}^{-1}$ ) is the Freundlich constant related to the sorption capacity and  $1/n$  a constant representing the degree of dependence of sorption with equilibrium concentration.

**Table S2.** Optimized parameters for Langmuir and Freundlich models of U(VI) adsorption on the AO/MOF composites

| T     | Langmuir model |              |        | Freundlich model                                  |        |        |
|-------|----------------|--------------|--------|---------------------------------------------------|--------|--------|
|       | $q_m$ (mg/g)   | $K_L$ (L/mg) | $R^2$  | $Ln K_F$ ( $\text{mg}^{1-n}\text{L}^n/\text{g}$ ) | $1/n$  | $R^2$  |
| 293 K | 454.55         | 0.5238       | 0.9987 | 4.8359                                            | 0.6758 | 0.9739 |
| 313 K | 476.19         | 1.6154       | 0.9958 | 5.183                                             | 0.6089 | 0.961  |
| 333 K | 497.51         | 0.7731       | 0.9992 | 5.4257                                            | 0.4928 | 0.9265 |
